# Supplementary material for: Enhanced outcoupling efficiency and removal of the microcavity effect in top-emitting OLED by using a simple vapor treated corrugated film
Source: Royal Society of Chemistry journal article supplement (doi:10.1039/c7ra11384f), 2017-01-01
Supplement: c7ra11384f1.pdf [file c7ra11384f1.pdf]

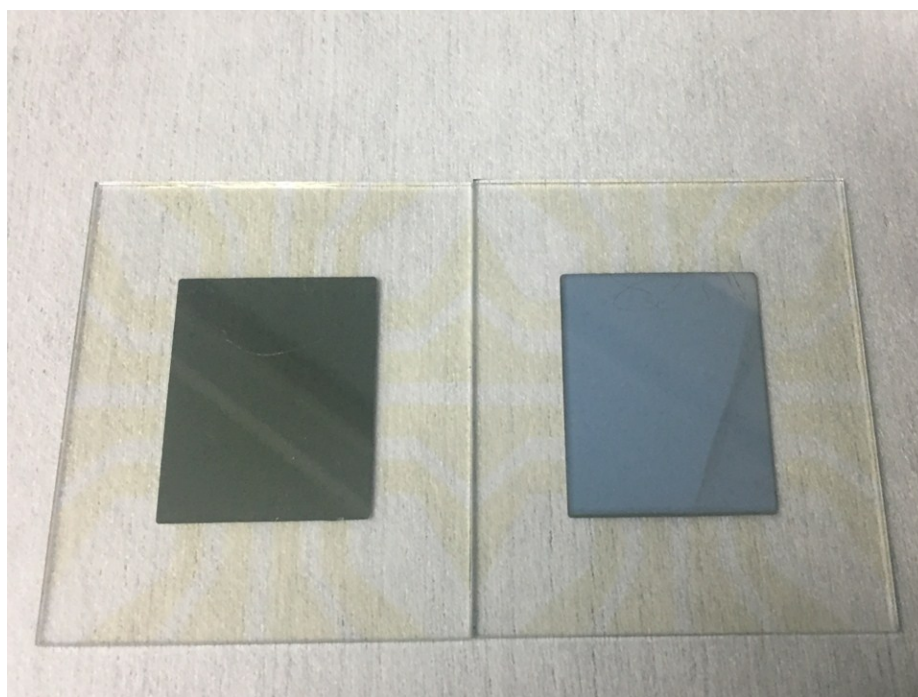

S1. left photo: Glass/Alq<sub>3</sub>(50nm,untreated)/Al(100nm) right photo: Glass/Alq<sub>3</sub>(50nm,vapor treated)/Al(100nm)

Depositing 100nm aluminum on untreated 50nm Alq<sub>3</sub>, it's forming the aluminum mirror, but on vapor treated Alq<sub>3</sub> film, the film exhibits a milky appearance, and light can be scattered by the corrugated aluminum surface.

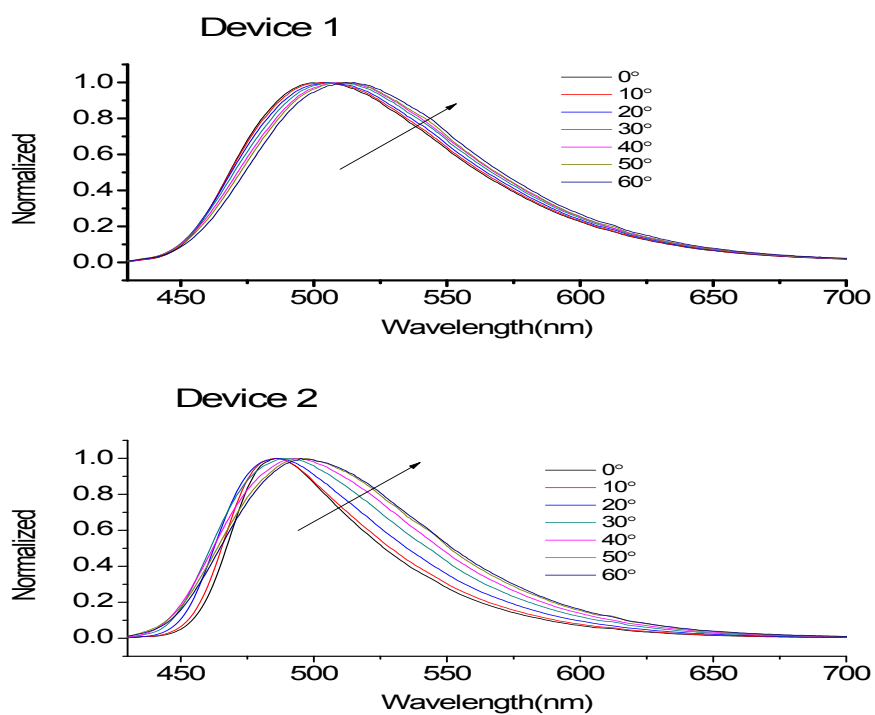

S2. Normalized angular EL spectrum of device 1 and device 2

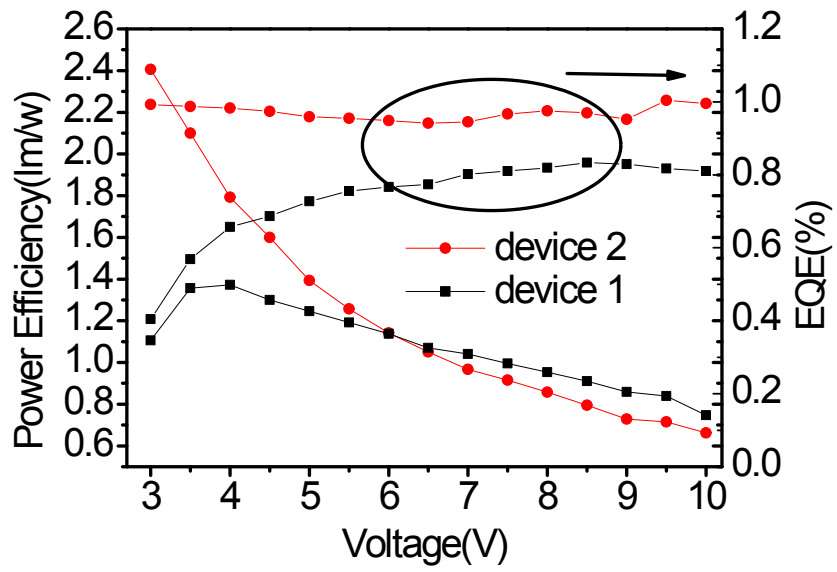

S3. The power efficiency and EQE of device 1 and device 2
